# Supplementary material for: Bacterial Genetic Architecture of Ecological Interactions in Co-culture by GWAS-Taking Escherichia coli and Staphylococcus aureus as an Example
Source: Front Microbiol. 2017 Nov 27;8:2332. doi: 10.3389/fmicb.2017.02332 (PMC5712204; doi:10.3389/fmicb.2017.02332)
Supplement: TABLE S5 — Growth performance of each species in evolution experiments. [file Table_5.XLSX]

## Sheet: monoculture E.coli
E.coli
time points strains	1	2	3	4	5	6	7	8	9	10	11	12	13	14	15	16
D1	101400000	1.13873e+08	49740000	122000000	167000000	253000000	136000000	122000000	222000000	315000000	174000000	189000000	94000000	338000000	476000000	326000000
D2	19320000	4.26305e+07	54060000	36800000	82600000	64900000	49100000	76200000	112000000	174000000	95400000	110000000	124000000	181600000	197600000	181600000
D3	85200000	6.22737e+07	229800000	175000000	222000000	290000000	154000000	217000000	282000000	212000000	338000000	233000000	321000000	388000000	778000000	374000000
D4	2250000	1.30116e+08	204600000	257000000	216000000	243000000	193000000	235000000	273000000	380000000	356000000	232000000	256000000	412000000	654000000	448000000
D5	68400000	1.41548e+08	42060000	109000000	179000000	112000000	61000000	200000000	252000000	108000000	119000000	118000000	228000000	336000000	674000000	484000000
D6	133800000	1.03217e+08	218400000	188000000	178000000	403000000	195000000	159000000	244000000	409000000	247000000	255000000	368000000	416000000	596000000	386000000
D7	105600000	1.20449e+08	286200000	160000000	200000000	195000000	128000000	111000000	169000000	204000000	278000000	318000000	134000000	224000000	516000000	384000000
D8	164400000	1.62877e+08	70200000	163000000	163000000	218000000	193000000	197000000	436000000	267000000	273000000	356000000	264000000	360000000	700000000	342000000
D9	122400000	1.27405e+08	241200000	175000000	176000000	220000000	180000000	137000000	78600000	220000000	197000000	205000000	198000000	384000000	448000000	448000000
D10	78000000	7.52657e+07	62400000	145000000	54500000	212000000	110000000	130000000	159000000	302000000	160000000	141000000	156000000	310000000	318000000	274000000
D11	185400000	1.8611e+08	120600000	157000000	169000000	320000000	101000000	156000000	164000000	417000000	150000000	129000000	257000000	408000000	336000000	246000000
D12	172800000	1.31032e+08	153000000	120000000	169000000	285000000	269000000	144000000	199000000	256000000	390000000	182000000	210000000	254000000	894000000	632000000
D13	283700000	2072000000	1025000000	1540000000	2287000000	306200000	1089000000	700500000	349600000	4834000000	4062000000	13220000000	1860000000	3745000000	648300000	957900000
D14	107400000	1.43549e+08	63600000	191000000	151000000	132000000	139000000	154000000	282000000	172000000	344000000	240000000	204000000	398000000	912000000	280000000
D15	446700000	534400000	417300000	472700000	2388000000	891500000	119700000	125100000	142400000	305900000	358000000	2779000000	1520000000	706300000	684700000	722100000
D16	1351000000	561100000	1392000000	849900000	607400000	408900000	348400000	1534000000	1808000000	4998000000	3857000000	8250000000	12140000000	2176000000	768500000	898600000
D17	472800000	1.05413e+08	72600000	182000000	178000000	148000000	140000000	59700000	202000000	338000000	413000000	170000000	110000000	312000000	610000000	280000000
D18	47340000	1.60607e+08	238800000	153000000	270000000	156000000	128000000	185000000	190000000	145000000	448000000	499000000	353000000	416000000	844000000	386000000
D19	11200000	7.63295e+07	66000000	35900000	241000000	187000000	140000000	125000000	256000000	152000000	177000000	230000000	182000000	280000000	686000000	380000000
D20	102600000	1.49722e+08	254400000	176000000	220000000	209000000	121000000	140000000	186000000	321000000	213000000	192000000	206000000	378000000	228000000	592000000
D21	193800000	1.82233e+08	95400000	149000000	196000000	365000000	138000000	168000000	254000000	184000000	347000000	201000000	175000000	282000000	300000000	630000000
D22	183600000	2.31341e+08	74400000	198000000	169000000	195000000	130000000	154000000	246000000	277000000	266000000	162000000	226000000	370000000	328000000	378000000
D23	184800000	1.25629e+08	113400000	141000000	229000000	225000000	77500000	149000000	367000000	143000000	336000000	353000000	173000000	374000000	396000000	362000000
D24	457700000	582800000	693100000	280100000	379100000	311000000	162000000	470400000	201700000	1423000000	1172000000	4588000000	6681000000	748000000	273800000	409700000
D25	46200000	6.27123e+07	230000000	181000000	161000000	263000000	177000000	130000000	218000000	205000000	85700000	188000000	69700000	366000000	726000000	272000000
D26	36300000	7.31822e+07	91000000	179000000	116000000	246000000	88400000	44300000	264000000	175000000	134000000	183000000	96700000	306000000	324000000	180000000
D27	42600000	8.07375e+07	258000000	231000000	322000000	172000000	72900000	140000000	161000000	305000000	34900000	152000000	209000000	388000000	438000000	260000000
D28	34800000	5.37403e+07	60500000	142000000	334000000	182000000	136000000	141000000	305000000	257000000	49800000	260000000	142000000	308000000	596000000	254000000
D29	33000000	6.63339e+07	173000000	163000000	131000000	110000000	116000000	130000000	320000000	324000000	59800000	123000000	110000000	350000000	374000000	380000000
D30	45000000	8.42098e+07	108000000	141000000	181000000	141100000	114000000	119000000	223000000	280000000	34200000	199000000	182000000	458000000	468000000	506000000
D31	18690000	1.10721e+08	129000000	145000000	131000000	53000000	94200000	81500000	225000000	256000000	31300000	258000000	92100000	358000000	498000000	146600000
D32	20340000	5.52702e+07	123000000	168000000	306000000	129000000	102000000	130000000	192000000	223000000	43900000	146000000	124000000	322000000	370000000	266000000
D33	575300	29970000	56810000	134800000	359600000	274700000	125400000	512800000	399100000	152100000	2542000000	1589000000	651100000	764400000	856800000	676300000
D34	43500000	7.74084e+07	151000000	155000000	147000000	191000000	90700000	108000000	102000000	223000000	44800000	159000000	92100000	224000000	576000000	133000000
D35	51600000	9.6899e+07	160000000	169000000	191000000	51100000	169000000	80200000	269000000	244000000	106000000	178000000	113000000	128800000	356000000	584000000
D36	657600000	255300000	1065000000	647800000	420600000	105000000	197400000	273400000	195000000	703000000	916800000	2656000000	3223000000	1452000000	309900000	293600000
D37	1029000000	928900000	699100000	941900000	2580000000	342600000	455600000	409100000	164600000	1610000000	4625000000	9467000000	9494000000	1337000000	508000000	815800000
D38	886300000	503200000	790400000	1214000000	2458000000	418500000	169200000	435400000	189900000	2781000000	2936000000	8522000000	7158000000	1280000000	466000000	340600000
D39	1060000000	1604000000	936900000	1021000000	1434000000	805800000	800600000	553600000	2031000000	3890000000	3614000000	8087000000	6499000000	1221000000	594400000	540700000
D40	72300000	5.29913e+07	118000000	95200000	261000000	82500000	137000000	106000000	132000000	163000000	68300000	183000000	74400000	378000000	446000000	182000000
D41	6480000	1.31124e+07	38900000	109000000	213000000	220000000	140000000	67200000	156000000	107000000	36300000	115000000	168000000	380000000	448000000	119800000
D42	93300000	9.82687e+07	178000000	131000000	238000000	150000000	171000000	130000000	331000000	322000000	70000000	154000000	162000000	348000000	450000000	318000000
D43	17280000	1.16377e+07	145000000	84400000	115000000	109000000	66600000	66400000	220000000	139000000	125000000	166000000	195000000	298000000	530000000	107400000
D44	17400000	2.18864e+07	29500000	66800000	88500000	15400000	15300000	13600000	13000000	20500000	9810000	16700000	12300000	28400000	22400000	12860000
D45	52200000	8.66072e+07	66100000	98200000	204000000	126000000	92500000	197000000	208000000	258000000	37500000	144000000	50600000	332000000	296000000	400000000

## Sheet: monoculture  S.aureus 
S.aureus
time points strains	1	2	3	4	5	6	7	8	9	10	11	12	13	14	15	16
J1	5016000	3018000	14700000	26700000	3280000	8640000	7840000	11600000	22900000	41100000	3310000	24300000	8500000	176700000	8660000	20800000
J2	4380000	3738000	18360000	105000000	9040000	42100000	5870000	15300000	3030000	61300000	24000000	422000000	262000000	1521000000	300000000	432000000
J3	8400000	28080000	22020000	112000000	10500000	65400000	17200000	84200000	16600000	106000000	18300000	35600000	48300000	891000000	183400000	294000000
J4	42240000	49200000	167400000	212000000	12800000	70800000	24600000	64100000	62900000	350000000	48600000	131000000	37100000	2157000000	38000000	102600000
J5	10380000	38040000	71400000	42700000	15100000	38100000	24400000	98000000	138000000	555000000	59500000	167000000	113000000	1530000000	192800000	174600000
J6	70800000	84000000	64200000	235000000	25000000	111000000	12500000	45500000	182000000	223000000	77000000	73400000	37800000	1398000000	120600000	202000000
J7	59580000	35100000	84000000	302000000	30700000	135000000	35300000	65000000	62800000	405000000	87700000	79300000	83800000	531000000	21000000	208000000
J8	3750000	7860000	12480000	39800000	5640000	21900000	10400000	56600000	11600000	42500000	6540000	69900000	32700000	729000000	81400000	37600000
J9	11100000	2982000	58380000	24500000	10200000	29900000	5420000	51100000	6880000	63200000	4180000	53000000	13000000	2487000000	4700000	19140000
J10	20160000	70800000	74400000	49300000	26700000	22500000	14400000	43400000	36100000	76600000	17300000	64200000	44500000	960000000	28800000	98000000
J11	29880000	38040000	38760000	193000000	28300000	82200000	55900000	175000000	83700000	471000000	36200000	195000000	60200000	1749000000	204000000	342000000
J12	9960000	10500000	30000000	46700000	7290000	65700000	40000000	30800000	8520000	75000000	16200000	61100000	20300000	390000000	16600000	99400000
J13	8103000	903000	23010000	134400000	254900000	40650000	20050000	56310000	37700000	14660000	15650000	118100000	241500000	739300000	711200000	3624000000
J14	8580000	7800000	25920000	70200000	6490000	15700000	15100000	41500000	8250000	87300000	18600000	60900000	15600000	1749000000	16120000	186200000
J15	4930000	9191000	18740000	641200000	107700000	543600000	46990000	52450000	48640000	34300000	24080000	1161000000	387600000	696800000	316100000	185300000
J16	51550000	86960000	116400000	137400000	94930000	62480000	75650000	140000000	204700000	670800000	279800000	433700000	157500000	899100000	467900000	4595000000
J17	10920000	41040000	18540000	42600000	28600000	12900000	16900000	46400000	10400000	218000000	36200000	45600000	25000000	1596000000	80800000	1300000000
J18	49260000	3642000	39600000	82100000	36600000	68000000	38700000	92600000	123000000	395000000	187000000	183000000	53500000	2427000000	218000000	408000000
J19	34200000	3468000	73200000	156000000	25500000	68300000	39700000	61000000	35000000	143000000	58300000	172000000	46100000	1365000000	100400000	109000000
J20	22740000	18300000	37440000	48400000	10800000	52900000	17800000	81200000	36400000	213000000	27800000	61600000	30700000	774000000	34600000	202000000
J21	4914000	7380000	30000000	90600000	13200000	73800000	72300000	71300000	20300000	239000000	5980000	84100000	10800000	1155000000	35200000	86600000
J22	36360000	13860000	36960000	161000000	19900000	72000000	18400000	41500000	23500000	71800000	23500000	69000000	24100000	1632000000	49600000	123000000
J23	7020000	28560000	33300000	11600000	27300000	43500000	40200000	52900000	8710000	40500000	24100000	14400000	52100000	194100000	23600000	99000000
J24	11280000	46910000	557200000	375200000	440400000	158800000	70080000	88610000	75450000	33680000	76040000	46590000	569700000	489600000	356100000	272200000
J25	11100000	85200000	20000000	42500000	24000000	86800000	18700000	52400000	897000	123000	91300	1440000	4040000	45000000	7200000	2450000
J26	3500000	41880000	13000000	45400000	21900000	112000000	19300000	49000000	78600000	283000000	661000	153000000	77800000	786000000	125800000	168800000
J27	1060000	15120000	8220000	52500000	5560000	39100000	9320000	45400000	26200000	132000000	1400000	84500000	50800000	600000000	102200000	216000000
J28	1880000	373.8	78.2	94.6	147	586	1190	24700	307	168	147	2780	394	11790	412	778
J29	2100000	10800000	20400000	7510000	7820000	11600000	9340000	94800000	125000000	46200000	371000	448000000	27000000	233100000	57800000	206000000
J30	20700	1590000	2060000	2040000	15800000	43100000	10100000	13500000	15000000	128000000	3550000	53300000	14220000	108300000	12140000	36400000
J31	14700000	60600000	14400000	80300000	11000000	93300000	28900000	55500000	59900000	247000000	10300000	91200000	43000000	438000000	63600000	70400000
J32	1230000	7800000	5890000	41800000	7330000	53700000	6290000	14000000	22200000	63600000	691000	122000000	18140000	152700000	31400000	52600000
J33	4906000	51770000	331300000	2182000000	2057000000	111400000	101900000	33240000	12930000	47940000	40120000	379300000	169000000	1134000000	384900000	1116000000
J34	2640000	10980000	8030000	42700000	11700000	60200000	13500000	43200000	14100000	25500000	146000	99300000	36400000	254100000	46800000	79800000
J35	3910000	7860000	11700000	39600000	19800000	66300000	10400000	43200000	24900000	65300000	1020000	139000000	23600000	135600000	40200000	88600000
J36	7580000	5105000	67610000	63060000	66660000	18990000	17030000	23630000	45470000	12690000	64980000	292200000	487200000	633100000	141900000	256700000
J37	17680000	48440000	208800000	151000000	521200000	31260000	17300000	81330000	11530000	42740000	53760000	232600000	1309000000	2841000000	168300000	233100000
J38	21580000	47190000	34290000	240100000	237100000	11530000	22060000	12980000	77570000	22640000	11410000	89810000	322700000	1012000000	138600000	795000000
J39	13860000	83870000	119400000	535200000	177400000	76480000	39090000	35330000	42600000	80660000	38020000	48290000	537500000	443300000	741300000	1307000000
J40	3780000	41160000	11100000	8380000	12100000	48600000	10500000	21500000	21900000	644000000	21100000	234000000	35000000	2661000000	60400000	418000000
J41	2010000	4410000	5620000	15000000	58100000	40900000	40800000	30000000	17000000	21800000	26700	196000000	22400000	369000000	72200000	8720000
J42	2220000	28740000	7560000	3970000	3790000	47500000	7410000	43000000	12200000	99800000	105000	28900000	69000000	675000000	57000000	138800000
J43	22.3	1068	83	1550	161	1920	547	1460	193	262	230	768	111.6	3360	150.2	786
J44	999000	7920000	23200000	5580000	9070000	6680000	5680000	14700000	12600000	44500000	1820000	81700000	15500000	255300000	20200000	204000000
J45	610000	1440000	7270000	6410000	18700000	27700000	3940000	13100000	19800000	39400000	853000	98100000	38000000	220800000	53000000	99400000

## Sheet: co-culture E.coli
E.coli
time points strains	1	2	3	4	5	6	7	8	9	10	11	12	13	14	15	16
D1	109200000	1.52908e+08	180600000	147000000	140000000	439000000	102000000	88600000	233000000	241000000	148000000	217000000	246000000	328000000	778000000	216000000
D2	4236000	9.03953e+06	12540000	13400000	6290000	16100000	12900000	9520000	22200000	31000000	20600000	27700000	14600000	30400000	26600000	15000000
D3	88200000	1.62877e+08	159600000	282000000	282000000	227000000	180000000	135000000	155000000	283000000	362000000	390000000	213000000	444000000	59000000	240000000
D4	122400000	1.96858e+08	199200000	238000000	447000000	265000000	259000000	192000000	202000000	290000000	241000000	587000000	259000000	316000000	1060000000	256000000
D5	94800000	1.75949e+08	81600000	126000000	125000000	103000000	82000000	99800000	410000000	241000000	141000000	234000000	75400000	192400000	378000000	112200000
D6	26580000	6.09763e+07	114600000	187000000	138000000	146000000	138000000	134000000	176000000	357000000	206000000	136000000	202000000	358000000	586000000	260000000
D7	154200000	1.6518e+08	166200000	207000000	184000000	134000000	101000000	80600000	294000000	331000000	187000000	212000000	236000000	324000000	314000000	122000000
D8	194400000	2.11169e+08	121200000	140000000	205000000	153000000	226000000	63200000	197000000	515000000	169000000	249000000	231000000	326000000	1162000000	274000000
D9	93000000	1.91408e+08	177000000	162000000	115000000	278000000	99400000	98100000	213000000	414000000	145000000	253000000	243000000	272000000	390000000	206000000
D10	55980000	1.26514e+08	115800000	395000000	117000000	87700000	56400000	65400000	222000000	375000000	220000000	232000000	217000000	216000000	466000000	324000000
D11	34500000	1.96858e+08	139200000	155000000	361000000	186000000	191000000	189000000	195000000	252000000	207000000	98800000	368000000	210000000	504000000	222000000
D12	32820000	2.81772e+07	65400000	68000000	154000000	92500000	63900000	29900000	110000000	110000000	55700000	110000000	67700000	172400000	115600000	59400000
D13	766000000	288300000	2511000000	1663000000	1875000000	416200000	641300000	361000000	237200000	4448000000	3185000000	10830000000	7960000000	1387000000	747300000	543700000
D14	139200000	1.26514e+08	31680000	102000000	57200000	29600000	54200000	10900000	17800000	19500000	64500000	47000000	59200000	202000000	114400000	131400000
D15	87430000	129300000	622500000	356100000	1294000000	284500000	253000000	131600000	182700000	1714000000	698400000	907100000	924400000	510100000	200200000	237900000
D16	566000000	397500000	3132000000	1345000000	1139000000	437700000	608900000	387000000	358900000	2638000000	6826000000	11940000000	12070000000	1193000000	573300000	871100000
D17	89400000	1.45578e+08	70200000	190000000	203000000	141000000	91600000	118000000	237000000	255000000	174000000	315000000	160000000	290000000	570000000	214000000
D18	85800000	1.14675e+08	83400000	262000000	317000000	108000000	147000000	155000000	471000000	374000000	303000000	118000000	63800000	466000000	816000000	222000000
D19	30480000	1.15482e+08	124200000	57300000	117000000	183000000	76800000	60100000	132000000	220000000	153000000	181000000	168000000	218000000	422000000	120600000
D20	145800000	1.49722e+08	105600000	157000000	200000000	195000000	97900000	124000000	356000000	359000000	390000000	221000000	399000000	332000000	500000000	206000000
D21	97200000	1.64024e+08	114000000	154000000	184000000	205000000	175000000	101000000	105000000	253000000	115000000	239000000	170000000	362000000	808000000	143800000
D22	61800000	1.48675e+08	113400000	191000000	317000000	126000000	135000000	118000000	263000000	316000000	193000000	219000000	248000000	434000000	388000000	132200000
D23	103800000	1.3382e+08	121200000	199000000	177000000	154000000	116000000	125000000	133000000	267000000	95800000	149000000	204000000	322000000	528000000	76600000
D24	232800000	342200000	784600000	853700000	414600000	199500000	599200000	117200000	133300000	253400000	645200000	443700000	354700000	703300000	147500000	276300000
D25	49800000	2.89794e+07	69400000	161000000	87200000	243000000	65400000	169000000	233000000	141000000	104000000	63600000	129000000	208000000	438000000	234000000
D26	32100000	35500000	37600000	173000000	198000000	139000000	170000000	59800000	164000000	189000000	7820000	226000000	78700000	242000000	600000000	226000000
D27	47100000	9.0968e+07	36500000	212000000	269000000	284000000	134000000	46700000	120000000	145000000	31600000	95900000	46200000	187000000	432000000	252000000
D28	13470000	1.13953e+07	11400000	70900000	184000000	178000000	111000000	64100000	116000000	162000000	53700000	94800000	130000000	185800000	446000000	260000000
D29	44400000	4.38442e+07	38000000	206000000	186000000	350000000	177000000	67000000	208000000	255000000	44700000	154000000	96700000	356000000	392000000	708000000
D30	3840000	4.20364e+07	28700000	180000000	231000000	313000000	199000000	159000000	167000000	139000000	46200000	95700000	120000000	310000000	570000000	220000000
D31	44400000	5.37403e+07	34700000	252000000	164000000	225000000	127000000	78000000	153000000	257000000	54900000	136000000	88900000	202000000	546000000	212000000
D32	28020000	6.40466e+07	52300000	186000000	177000000	114000000	131000000	156000000	346000000	212000000	27800000	162000000	159000000	248000000	510000000	170800000
D33	216200	33510000	84040000	129800000	218000000	404500000	248700000	127900000	218100000	815100000	194800000	216300000	67270000	54280000	89630000	63720000
D34	25020000	2.66388e+07	26600000	202000000	107000000	92600000	137000000	61700000	227000000	215000000	41500000	77600000	84900000	268000000	362000000	360000000
D35	41100000	3.94634e+07	30100000	170000000	216000000	220000000	185000000	60500000	194000000	160000000	23200000	83500000	84200000	230000000	488000000	192400000
D36	653100000	115900000	1250000000	1275000000	830100000	278000000	172600000	96970000	177400000	206400000	217000000	288600000	492900000	544800000	273700000	274400000
D37	378900000	391900000	1894000000	2191000000	1140000000	525200000	291000000	288800000	2458000000	2822000000	2726000000	7613000000	8633000000	2135000000	364100000	612400000
D38	508700000	265000000	2309000000	2660000000	1588000000	627400000	863400000	281400000	2416000000	3422000000	1381000000	10560000000	7667000000	1525000000	415200000	646700000
D39	231000000	704900000	2409000000	2647000000	859500000	1035000000	600700000	481000000	4811000000	7124000000	2623000000	3994000000	7512000000	1511000000	752000000	93120000
D40	49500000	5.80532e+07	64800000	249000000	171000000	127000000	116000000	51400000	176000000	299000000	31600000	161000000	71500000	260000000	668000000	204000000
D41	5610000	1.36763e+07	5180000	149000000	168000000	170000000	99700000	57500000	183000000	153000000	20100000	160000000	62500000	266000000	524000000	364000000
D42	50400000	6.54093e+07	62000000	196000000	226000000	184000000	91400000	58100000	126000000	247000000	48600000	135000000	201000000	256000000	438000000	220000000
D43	8430000	8.546e+06	22700000	60200000	95200000	159000000	188000000	84800000	293000000	73600000	82600000	123000000	130000000	232000000	572000000	338000000
D44	2343000	3.17476e+07	42100000	182000000	136000000	251000000	138000000	63100000	289000000	88300000	13500000	101000000	92100000	234000000	490000000	149600000
D45	36300000	2.06915e+07	31600000	228000000	129000000	278000000	143000000	104000000	301000000	109000000	28400000	100000000	122000000	242000000	520000000	154000000

## Sheet:  co-culture  S.aureus
S.aureus
time points strains	1	2	3	4	5	6	7	8	9	10	11	12	13	14	15	16
J1	1014000	18660	2616	370	920	543	1610	146	249	2420	413	2820	187	16410	426	406
J2	15540000	8820000	39960000	21500000	7020000	46600000	15700000	23900000	8140000	52300000	14600000	29400000	16600000	1371000000	29800000	27000000
J3	229200	2694	1236	678	136	1660	221	207	778	688	650	334	461	4080	52	54
J4	1062000	23040	684	633	60.1	1940	474	333	1930	554	439	1840	258	6960	144.6	780
J5	38280	2190	1218	749	167	2240	492	152	863	853	531	1170	452	15570	496	524
J6	4896000	1182000	2040000	2400000	461000	382000	266000	329000	442000	495000	973000	770000	1780000	1284000	10380	356000
J7	618000	50340	10020	2960	557	39800	236	151	308	661	460	996	1040	3540	470	286
J8	387600	1614	393	1030	184	736	1290	177	87.1	755	319	484	705	5100	129	674
J9	618000	702000	654000	48600	37500	281000	776000	9530000	12800000	8750000	7850000	14700000	20300000	44700000	5720000	10080000
J10	714000	28080000	1722000	38400000	6050000	16000000	2950000	18100000	3810000	46300000	5120000	37700000	29000000	123000000	22800000	31000000
J11	52200	864000	2430000	4740000	17900000	9110000	6000000	27600000	1330000	13300000	21100000	24100000	24800000	108300000	15220000	50000000
J12	23700	5718	1182	2380	1340	1320	533	2040	353	540	475	767	108	1008	150.2	250
J13	11600000	4635000	5901000	2325000	3051000	1180000	2532000	1576000	523400	1376000	6426000	246900000	132700000	80650000	71950000	84040000
J14	72600	1206	1824	319	42.7	667	95.3	18.7	14	67.5	138	213	187	10860	240	290
J15	6740000	8078000	17480000	52600000	10570000	16330000	6669000	13750000	12020000	12340000	35470000	94280000	46590000	175200000	181100000	84550000
J16	1380000	2288000	23310000	16040000	28410000	14130000	6484000	3128000	4421000	11220000	130800000	336500000	354700000	200900000	264300000	347300000
J17	6120000	3450000	196800	17500	6770	19100	19800	101000	903000	2630000	2420000	6650000	8730000	53700000	11800000	24800000
J18	231000	1686000	17400	4180	493	1110	569	209	435	633	46300	22100	5540	7170	570	308
J19	7440000	6120000	11700000	20900000	6060000	17600000	3550000	4220000	3460000	13500000	5730000	4070000	9700000	116100000	9840000	10680000
J20	708000	67800	66600	2090	1970	1650	574	773	5730	5810	5030	2860	6150	72600	2500	690
J21	145800	1008	566.4	185	64.4	1450	153	105	940	597	956	1220	398	9480	318	240
J22	41580	175200	174000	581000	215000	197000	16000	11100	23600	18800	59600	55300	596000	1662000	97400	196000
J23	18840000	390000	9660	2560	810	751	533	191	679	1150	866	585	256	4200	2220	63
J24	2940000	5165000	22770000	102700000	24670000	72470000	24950000	28600000	6943000	14530000	21140000	92550000	63660000	68760000	105800000	103200000
J25	123000	12720000	3930000	6460000	5870000	15100000	3950000	7710000	7120000	9950000	3470000	7550000	19280000	59100000	15460000	8100000
J26	1990	24300	179000	84800	347000	1250000	929000	1500000	2030000	2620000	103000	3630000	8680000	26700000	5320000	3440000
J27	5950	64800	20400	2570	6150	13600	104000	17200	51400	48600	11900	11300	678	6810	342	352
J28	706000	13080000	1760000	2800000	238000	28900000	628000	24900000	3030000	16900000	2060000	8120000	26200000	137100000	4660000	27800000
J29	996	78600	160000	311000	320000	938000	396000	657000	788000	562000	172000	707000	822000	6000000	994000	1806000
J30	8840	321600	1090000	1240000	1930000	6550000	626000	1170000	7980000	6390000	545000	7830000	1912000	4440000	3000000	9180000
J31	10400	92400	15700	12100	1740	4200	8300	11400	52200	77900	81100	273000	744000	2034000	420000	193000
J32	18600	3114000	106000	544000	613000	3490000	177000	1660000	564000	2660000	696000	6720000	16520000	79200000	6060000	16780000
J33	13400000	29660000	23750000	54410000	6986000	8400000	3062000	6526000	6340000	42260000	74750000	24720000	51530000	90070000	66230000	110600000
J34	140000	514200	150000	483000	161000	458000	1680000	3250000	1310000	1130000	373000	2260000	1352000	5640000	2100000	2680000
J35	76800	1032000	98200	175000	67800	159000	75500	82200	120000	136000	38600	382000	2100000	18150000	2280000	1292000
J36	24600000	28130000	37080000	82640000	20760000	17280000	14570000	5599000	8305000	24770000	45160000	104800000	80820000	97880000	63620000	89490000
J37	9720000	7465000	23740000	19650000	77940000	39900000	13960000	38440000	18490000	49850000	95410000	820300000	251500000	474500000	286200000	423800000
J38	728000	1184000	2649000	902100	711500	206100	259600	168700	142300	140000	408100	873300	788000	1187000	1374000	687700
J39	10400000	40160000	46610000	70990000	34270000	162800000	15980000	69510000	78720000	313300000	232400000	830900000	453900000	221200000	630000000	673300000
J40	1230000	2238000	15300	2430	367	528	290	1230	261	157	898	2100	258	4320	111.6	588
J41	55900	948000	473000	4330000	60300	41800	1990000	4390000	711000	3180000	1190000	1060000	7940000	26370000	9220000	7680000
J42	582000	492600	6050	2890	515	1740	231	989	305	501	678	1190	344	4080	127.8	760
J43	29.2	209.4	63.5	836	351	3110	85.6	4260	152	300	1460	2890	900	1017	300	850
J44	1010	22680	1150	480	476	3460	113	509	384	178	430	2190	736	3030	476	1498
J45	3640	3138	73.8	120	371	2160	619	496	598	261	254	1070	298	5910	250	3360
